# Supplementary material for: Short-Term Sleep Fragmentation Dysregulates Autophagy in a Brain Region-Specific Manner
Source: MDPI journal article supplement (doi:10.3390/life11101098), 2021-10-16
Supplement: s1 [file s1]

Article

# Short-Term Sleep Fragmentation Dysregulates Autophagy in a Brain Region-Specific Manner

Yan Cheng <sup>1,2,3</sup>, Woong-Ki Kim <sup>1,4</sup>, Laurie L. Wellman <sup>1,2</sup>, Larry D. Sanford <sup>1,2</sup>, Ming-Lei Guo <sup>1,3,\*</sup>

<sup>1</sup> Center for Integrative Neuroscience and Inflammatory Diseases, Eastern Virginia Medical School, Norfolk, VA 23507, USA; chengy@evms.edu (Y.C.); kimw@evms.edu (W.-K.K.); WellmaLL@evms.edu (L.L.W.); SanforLD@evms.edu (L.D.S.)

<sup>2</sup> Sleep Research Laboratory, Department of Pathology and Anatomy, Eastern Virginia Medical School, Norfolk, VA 23507, USA

<sup>3</sup> Drug Addiction Laboratory, Department Pathology and Anatomy, Eastern Virginia Medical School, Norfolk, VA 23507, USA

<sup>4</sup> Department of Microbiology and Molecular Cell Biology, Eastern Virginia Medical School, Norfolk, VA 23507, USA

\* Correspondence: GuoM@evms.edu; Tel: +1-757-446-5891

**Citation:** Cheng, Y.; Kim, W.-K.; Wellman, L.L.; Sanford, L.D.; Guo, M.-L. Short-Term Sleep Fragmentation Dysregulates Autophagy in a Brain Region-Specific Manner. *Life* **2021**, *11*, 1098.  
<https://doi.org/10.3390/life11101098>

Academic Editor: Marina Saresella

Received: 28 September 2021

Accepted: 14 October 2021

Published: 16 October 2021

**Publisher's Note:** MDPI stays neutral with regard to jurisdictional claims in published maps and institutional affiliations.

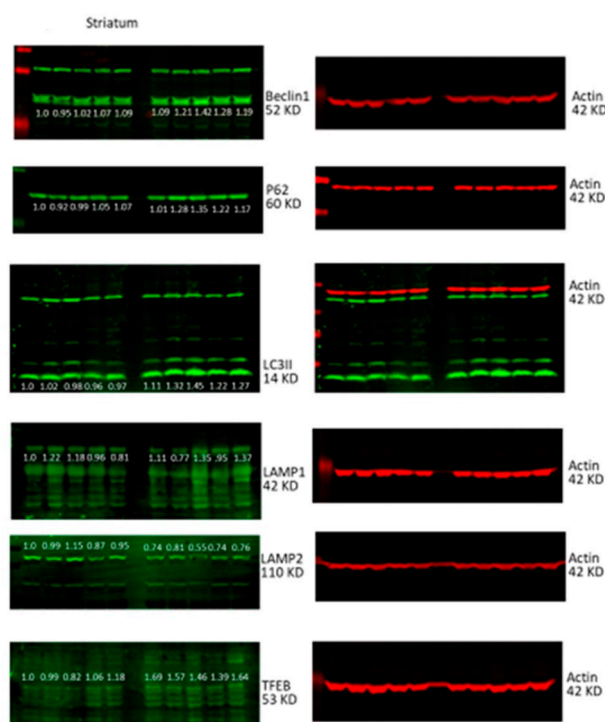

**Figure S1.** Short-term sleep fragmentation (SF) dysregulated autophagy in the striatum.

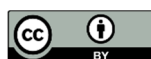

**Copyright:** © 2021 by the authors. Licensee MDPI, Basel, Switzerland. This article is an open access article distributed under the terms and conditions of the Creative Commons Attribution (CC BY) license (<http://creativecommons.org/licenses/by/4.0/>).

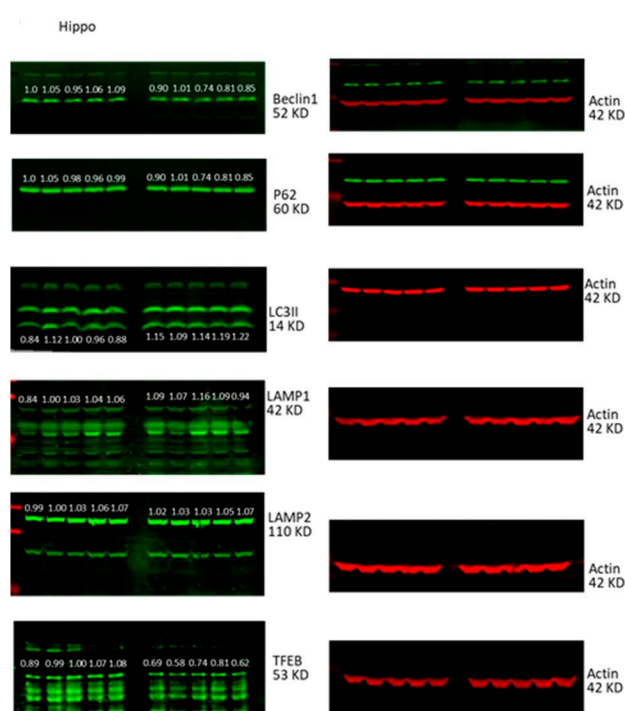

**Figure S2.** Short-term SF dysregulated autophagy in the hippocampus.

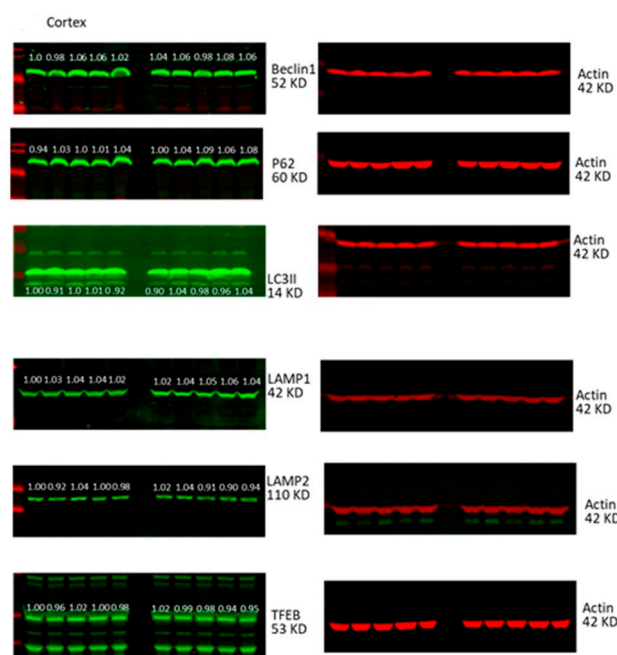

**Figure S3.** Short-term SF had no impact on autophagy in the frontal cortex.

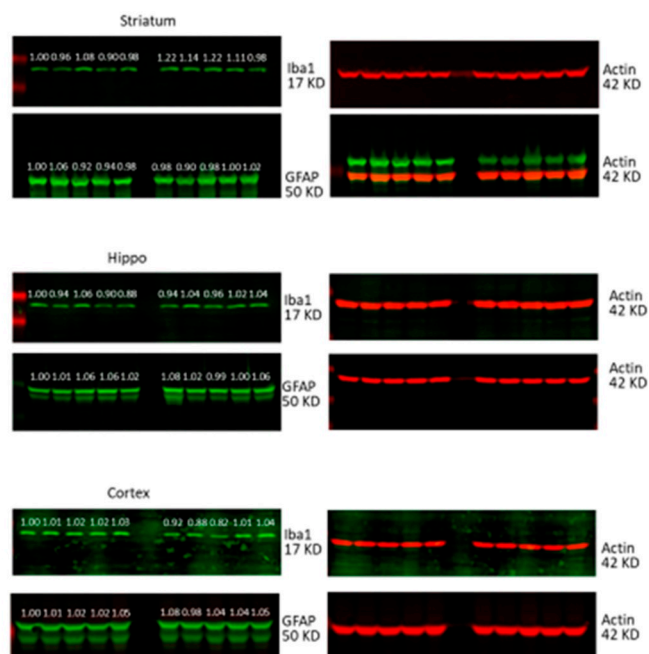

**Figure S4.** Short-term SF activated microglia in a region-specific manner in vivo

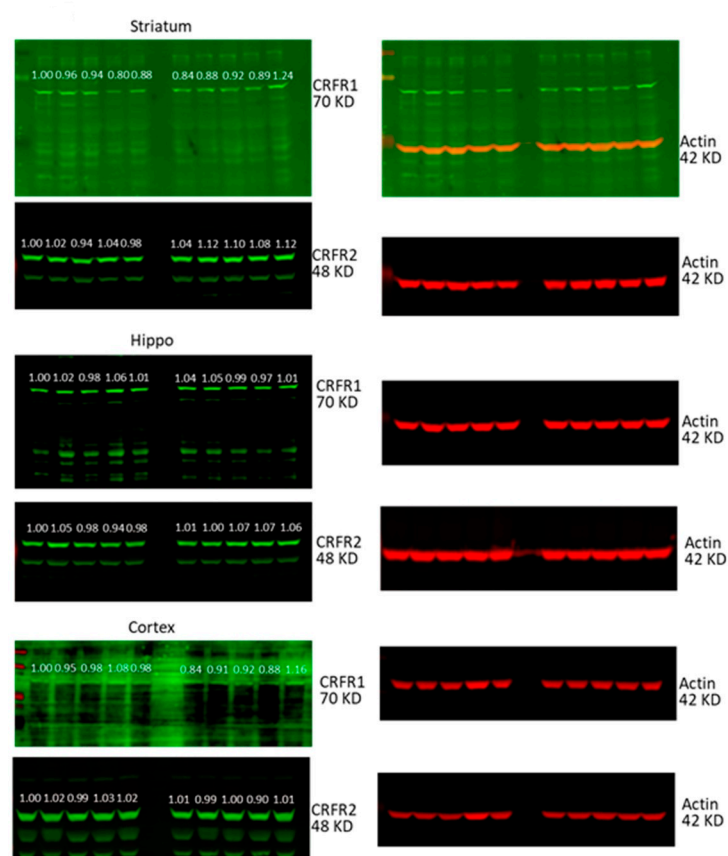

**Figure S5.** The effects of short-term SF on CRF signaling in extrahypothalamic regions.
